# Supplementary material
Source: publisher figshare collection journal article supplement (https://geolsoc.figshare.com/ndownloader/files/31479028)
Supplement: Supplementary file 1 [file 31479028]

## Sheet: Sheet1
Supplementary material A1. Summary of the main microstructural features recorded in Malín Unit, Kouřim Unit and Micaschist Zone related to defined deformation phases.
	D1	D2	D3	D4
Malín Unit Mineral association: Pl, Qz, Kfs, Grt, Ky, St, Bt, Ms, Ap, Zrn, Rt, Mnz, Ilm, Tur	rootless isoclinal micro folds	ms+bt bands; qz+pl+kfs bands; interstitial kfs at triple points or thin films	reorientation of bt and ms; growth of new mica; qz subgrains	unaffected
Kouřim Unit Mineral association: Qz, Pl, Kfs, Ms, Bt, Grt, Sil, Chl, Ap, Zrn, Mnz, Ilm	not observed	rootless isoclinal micro folds	ms+bt bands; qz+pl+kfs bands; qz ribbons; pl+kfs foam-like microstructure; admixed ameboid qz+kfs+pl; interstitial kfs at triple points or thin films; isoclinal qz micro folds in YZ section	crenulation cleavage; bending, undulose extinction and fracturing of ms+bt; qz bulging
Micaschist Zone Mineral association: Kfs, Pl, Qz, Ms, Bt, Grt, Ky, Ap, Zrn, Rt, Mnz	not observed	rootless isoclinal micro folds	ms+bt bands; qz+pl+kfs bands; qz ribbons; equigranular, polygonal grains; 120° triple point junctions	qz bulging ; qz core and mantle; ms+bt bending and undulose extinction
